# Supplementary material for: Uncovering chemical signatures of salinity gradients through compositional analysis of protein sequences
Source: Copernicus journal article supplement (doi:10.5194/bg-17-6145-2020), 2020-12-08
Supplement: Supplementary file 1 [file bg-17-6145-2020-supplement.zip]

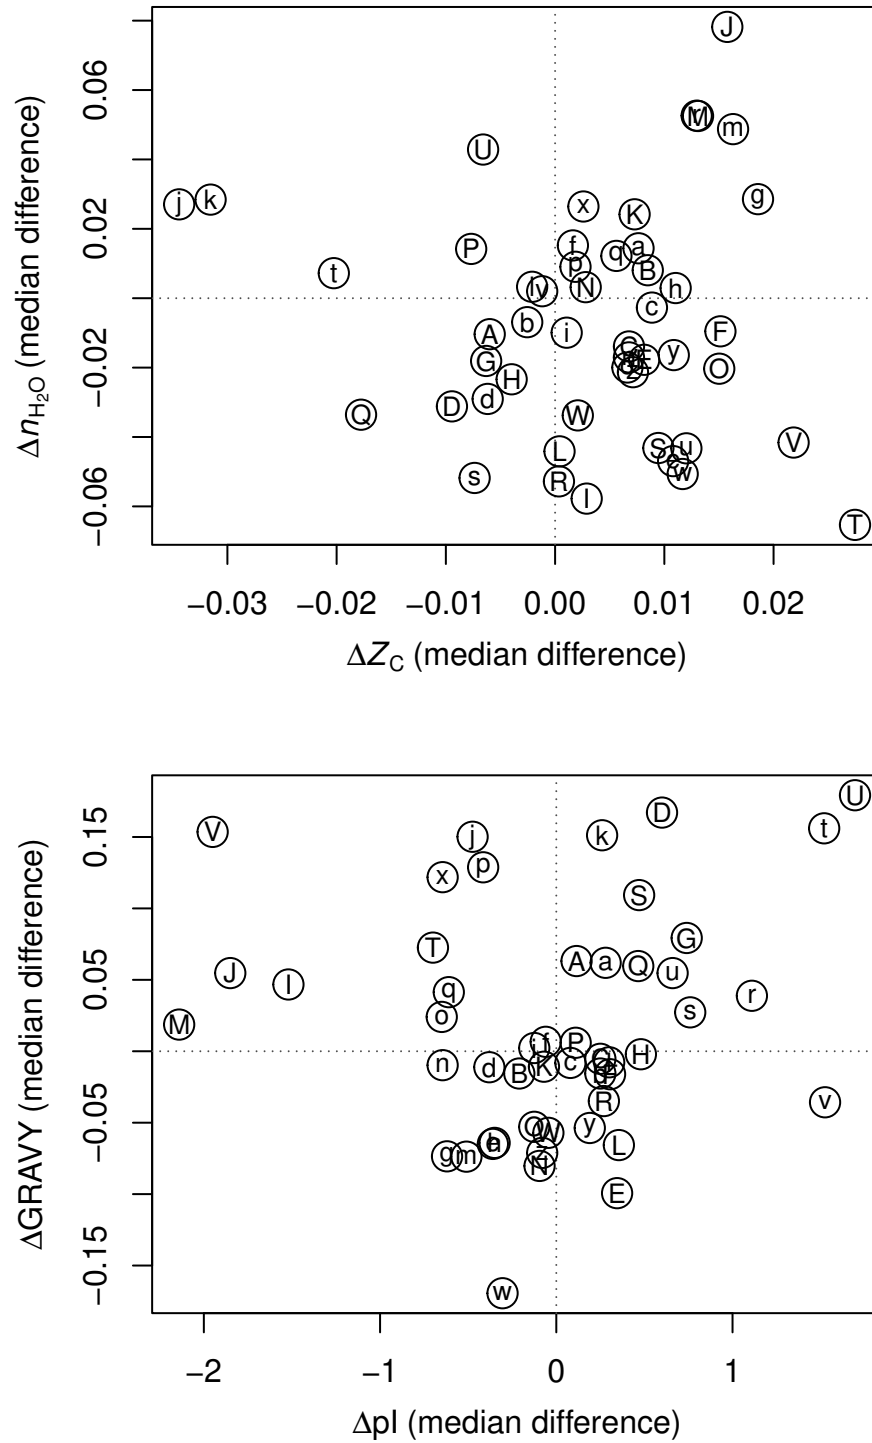

Figure S1: Transcriptomics data for non-halophilic bacteria in hyperosmotic stress experiments. The plots show median differences of compositional metrics, GRAVY, and pI for proteins coded by the differentially expressed genes, i.e. median value for all up-regulated proteins minus median value for all down-regulated proteins in each dataset. Data sources, indicated by letters, are described in the following table and footnotes. Reference keys in the table, derived from the first letters of the authors' surnames and publication year, correspond to file names used for the datasets in the canprot package.

| Set | Reference | Description                                                                      | Down | Up  |
|-----|-----------|----------------------------------------------------------------------------------|------|-----|
| a   | KSA+02    | <i>Synechocystis</i> sp. PCC 6803 in 0.5 M NaCl vs control                       | 36   | 62  |
| b   | KSA+02    | <i>Synechocystis</i> sp. PCC 6803 in 0.5 M sorbitol vs control                   | 32   | 45  |
| c   | WJ02      | <i>Escherichia coli</i> in 0.4 M NaCl vs control                                 | 102  | 41  |
| d   | HZP+05    | <i>Yersinia pestis</i> in 0.5 M NaCl vs control                                  | 13   | 103 |
| e   | HZP+05    | <i>Yersinia pestis</i> in 0.5 M sorbitol vs control                              | 40   | 103 |
| f   | LGW+05    | <i>Shewanella oneidensis</i> MR-1 in 0.5 vs 0.1 M NaCl                           | 563  | 541 |
| g   | SLA+05    | <i>Synechocystis</i> sp. PCC 6803 in 0.5 M sorbitol vs control                   | 27   | 53  |
| h   | GCP08     | <i>Escherichia coli</i> in 0.5 M vs 0 M NaCl at 30 deg C                         | 307  | 40  |
| i   | GCP08     | <i>Escherichia coli</i> in 0.5 M vs 0 M NaCl at 43 deg C                         | 89   | 144 |
| j   | SBB+09    | <i>Escherichia coli</i> in 2.7 Os/kg NaCl vs control                             | 35   | 26  |
| k   | SBB+09    | <i>Escherichia coli</i> in 2.7 Os/kg sucrose vs control                          | 28   | 37  |
| l   | HMO+10    | <i>Bacillus subtilis</i> in 6% w/v NaCl vs control                               | 417  | 459 |
| m   | BBWB12    | <i>Listeria monocytogenes</i> strain H7858 in 6% NaCl at 2.5% lag-phase duration | 18   | 55  |
| n   | BBWB12    | <i>Listeria monocytogenes</i> strain H7858 in 6% NaCl at 5% lag-phase duration   | 85   | 134 |
| o   | BBWB12    | <i>Listeria monocytogenes</i> strain H7858 in 6% NaCl at 10% lag-phase duration  | 136  | 156 |
| p   | BBWB12    | <i>Listeria monocytogenes</i> strain H7858 in 6% NaCl at 20% lag-phase duration  | 58   | 44  |
| q   | LB12      | <i>Synechococcus</i> sp. strain PCC 7002 in 1.5 M NaCl vs control                | 311  | 646 |
| r   | QHT+13    | <i>Synechocystis</i> sp. PCC 6803 Gene in 4% w/v vs 0% added NaCl for 24 h       | 50   | 48  |
| s   | QHT+13    | <i>Synechocystis</i> sp. PCC 6803 Gene in 4% w/v vs 0% added NaCl for 48 h       | 50   | 50  |
| t   | QHT+13    | <i>Synechocystis</i> sp. PCC 6803 Gene in 4% w/v vs 0% added NaCl for 72 h       | 50   | 49  |
| u   | WGB+13    | <i>Escherichia coli</i> in 0.3 M NaCl vs control                                 | 525  | 524 |
| v   | WGB+13    | <i>Escherichia coli</i> in 0.6 M urea vs control                                 | 337  | 370 |
| w   | ADW+14    | <i>Bifidobacterium longum</i> BBM68 Gene with vs without 0.75 g/l ox bile        | 160  | 76  |
| x   | KKG+14    | <i>Escherichia coli</i> Gene in NaCl (0.967 aw) vs control for 30 min            | 15   | 164 |
| y   | KKG+14    | <i>Escherichia coli</i> Gene in NaCl (0.967 aw) vs control for 80 min            | 409  | 727 |
| z   | KKG+14    | <i>Escherichia coli</i> Gene in NaCl (0.967 aw) vs control for 310 min           | 319  | 571 |
| A   | KSM+14    | <i>Bacillus subtilis</i> in 1.2 M NaCl vs control                                | 687  | 642 |
| B   | KSM+14    | <i>Bacillus subtilis</i> with vs without glycine betaine in 1.2 M NaCl           | 311  | 559 |
| C   | MGM+14    | <i>Escherichia coli</i> in 3.5 vs 2% NaCl (with glycine betaine)                 | 169  | 64  |
| D   | MGM+14    | <i>Escherichia coli</i> in 4.5 vs 2% NaCl (with glycine betaine)                 | 740  | 579 |
| E   | MGM+14    | <i>Escherichia coli</i> in 5 vs 2% NaCl (with glycine betaine)                   | 43   | 82  |
| F   | MGM+14    | <i>Escherichia coli</i> in 5.5 vs 2% NaCl (with glycine betaine)                 | 79   | 84  |
| G   | SLM+14    | <i>Enterococcus faecalis</i> in 6.5% NaCl vs control at 5 min                    | 113  | 69  |
| H   | SLM+14    | <i>Enterococcus faecalis</i> in 6.5% NaCl vs control at 30 min                   | 125  | 175 |
| I   | SLM+14    | <i>Enterococcus faecalis</i> in 6.5% NaCl vs control at 60 min                   | 170  | 172 |
| J   | FRH+15    | <i>Salmonella enterica</i> in NaCl vs control for 1h h                           | 113  | 60  |
| K   | FRH+15    | <i>Salmonella enterica</i> in NaCl vs control for 6h h                           | 255  | 149 |
| L   | FRH+15    | <i>Salmonella enterica</i> in NaCl vs control for 24h h                          | 163  | 60  |
| M   | FRH+15    | <i>Salmonella enterica</i> in KCl vs control for 1h h                            | 92   | 45  |
| N   | FRH+15    | <i>Salmonella enterica</i> in KCl vs control for 6h h                            | 349  | 264 |
| O   | FRH+15    | <i>Salmonella enterica</i> in KCl vs control for 24h h                           | 403  | 182 |
| P   | FRH+15    | <i>Salmonella enterica</i> in glycerol vs control for 1h h                       | 300  | 333 |
| Q   | FRH+15    | <i>Salmonella enterica</i> in glycerol vs control for 6h h                       | 261  | 132 |
| R   | FRH+15    | <i>Salmonella enterica</i> in glycerol vs control for 24h h                      | 164  | 67  |
| S   | KLB+15    | <i>Caulobacter crescentus</i> Gene in 40/50 mM NaCl vs M2 minimal salts medium   | 209  | 142 |
| T   | KLB+15    | <i>Caulobacter crescentus</i> Gene in 200 mM sucrose vs M2 minimal salts medium  | 105  | 96  |
| U   | HLL17     | <i>Methylocystis</i> sp. strain SC2 in 0.75% NaCl vs control at 45min            | 105  | 46  |
| V   | HLL17     | <i>Methylocystis</i> sp. strain SC2 in 0.75% NaCl vs control at 14h              | 22   | 75  |
| W   | MWZ+18    | <i>Lactobacillus paracasei</i> L9 with vs without 0.13% ox bile                  | 42   | 56  |

**a. b.** Tables 1–2 of Kanesaki et al. (2002). **c.** Table 1 of Weber and Jung (2002). **d. e.** Table 3 of Han et al. (2005). **f.** Table 1S of Liu et al. (2005). **g.** Tables 2–3 of Shapiguzov et al. (2005). **h. i.** [Dataset.txt](#) of Gunasekera et al. (2008). **j. k.** Table 3 of Shabala et al. (2009). **l.** Table S2 (sheet “S2\_Table\_3”) of Hahne et al. (2010). **m. n. o. p.** Table S5 of Bergholz et al. (2012), filtered to include genes with  $\log_2$  fold change  $> 1$  or  $< -1$ . **q.** Table S2 of Ludwig and Bryant (2012), filtered to include genes with  $p$ -value  $< 0.05$  and fold change  $> 2$  or  $< 0.5$ . **r. s. t.** Supplementary Tables S2A–S2F of Qiao et al. (2013). **u. v.** [Dataset.txt](#) of Withman et al. (2013), filtered to include proteins with log fold change (column “N vs K Wmean [M]” for NaCl and “U vs K Wmean [M]” for urea)  $> 1$  or  $< 1$  and  $p$ -value less than 0.05. **w.** Table S2 of An et al. (2014) **x. y. z.** Table S2 of Kocharunchitt et al. (2014) **A. B.** Tables S5–S6 of Kohlstedt et al. (2014). **C. D. E. F.** Supplemental Table S1 of Metris et al. (2014), filtered to include genes with differences of Normalized  $\ln(\text{cDNA/gDNA}) > 1$  or  $< 1$  between 2 % and higher NaCl concentration. **G. H. I.** Table S2 of Solheim et al. (2014). **J. K. L. M. N. O. P. Q. R.** Tables S1–S3 of Finn et al. (2015). **S. T.** Table S2 of Kohler et al. (2015). **U. V.** Tables S5–S8 of Han et al. (2017). **W.** Table S6 of Ma et al. (2018).

## References

- An, H., Douillard, F. P., Wang, G., Zhai, Z., Yang, J., Song, S., Cui, J., Ren, F., Luo, Y., Zhang, B. and Hao, Y.: Integrated transcriptomic and proteomic analysis of the bile stress response in a centenarian-originated probiotic *Bifidobacterium longum* BBMN68, *Molecular & Cellular Proteomics*, 13(10), 2558–2572, doi:[10.1074/mcp.M114.039156](#), 2014.
- Bergholz, T. M., Bowen, B., Wiedmann, M. and Boor, K. J.: *Listeria monocytogenes* shows temperature-dependent and -independent responses to salt stress, including responses that induce cross-protection against other stresses, *Applied and Environmental Microbiology*, 78(8), 2602–2612, doi:[10.1128/AEM.07658-11](#), 2012.
- Finn, S., Rogers, L., Händler, K., McClure, P., Amézquita, A., Hinton, J. C. D. and Fanning, S.: Exposure of *Salmonella enterica* serovar Typhimurium to three humectants used in the food industry induces different osmoadaptation systems, *Applied and Environmental Microbiology*, 81(19), 6800–6811, doi:[10.1128/AEM.01379-15](#), 2015.
- Gunasekera, T. S., Csonka, L. N. and Paliy, O.: Genome-wide transcriptional responses of *Escherichia coli* K-12 to continuous osmotic and heat stresses, *Journal of Bacteriology*, 190(10), 3712–3720, doi:[10.1128/JB.01990-07](#), 2008.
- Hahne, H., Mäder, U., Otto, A., Bonn, F., Steil, L., Bremer, E., Hecker, M. and Becher, D.: A comprehensive proteomics and transcriptomics analysis of *Bacillus subtilis* salt stress adaptation, *Journal of Bacteriology*, 192(3), 870–882, doi:[10.1128/JB.01106-09](#), 2010.
- Han, D., Link, H. and Liesack, W.: Response of *Methylocystis* sp. Strain SC2 to salt stress: Physiology, global transcriptome, and amino acid profiles, *Applied and Environmental Microbiology*, 83(20), e00866–17, doi:[10.1128/AEM.00866-17](#), 2017.
- Han, Y., Zhou, D., Pang, X., Zhang, L., Song, Y., Tong, Z., Bao, J., Dai, E., Wang, J., Guo, Z., Zhai, J., Du, Z., Wang, X., Wang, J., Huang, P. and Yang, R.: Comparative transcriptome analysis of *Yersinia pestis* in response to hyperosmotic and high-salinity stress, *Research in Microbiology*, 156(3), 403–415, doi:[10.1016/j.resmic.2004.10.004](#), 2005.
- Kanesaki, Y., Suzuki, I., Allakhverdiev, S. I., Mikami, K. and Murata, N.: Salt stress and hyperosmotic stress regulate the expression of different sets of genes in *Synechocystis* sp. PCC 6803, *Biochemical and Biophysical Research Communications*, 290(1), 339–348, doi:[10.1006/bbrc.2001.6201](#), 2002.
- Kocharunchitt, C., King, T., Gobius, K., Bowman, J. P. and Ross, T.: Global genome response of *Escherichia coli* O157:H7 Sakai during dynamic changes in growth kinetics induced by an abrupt downshift in water activity, *PLoS One*, 9(3), 1–13, doi:[10.1371/journal.pone.0090422](#), 2014.
- Kohler, C., Lourenço, R. F., Bernhardt, J., Albrecht, D., Schüler, J., Hecker, M. and Gomes, S. L.: A comprehensive genomic, transcriptomic and proteomic analysis of a hyperosmotic stress sensitive  $\alpha$ -proteobacterium, *BMC Microbiology*, 15(1), 1–15, doi:[10.1186/s12866-015-0404-x](#), 2015.
- Kohlstedt, M., Sappa, P. K., Meyer, H., Maaß, S., Zapras, A., Hoffmann, T., Becker, J., Steil, L., Hecker, M., Dijk, J. M. van, Lalk, M., Mäder, U., Stülke, J., Bremer, E., Völker, U. and Wittmann, C.: Adaptation of *Bacillus subtilis* carbon core metabolism to simultaneous nutrient limitation and osmotic challenge: A multi-omics perspective, *Environmental Microbiology*, 16(6), 1898–1917, doi:[10.1111/1462-2920.12438](#), 2014.

- Liu, Y., Gao, W., Wang, Y., Wu, L., Liu, X., Yan, T., Alm, E., Arkin, A., Thompson, D. K., Fields, M. W. and Zhou, J.: Transcriptome analysis of *Shewanella oneidensis* MR-1 in response to elevated salt conditions, *Journal of Bacteriology*, 187(7), 2501–2507, doi:[10.1128/JB.187.7.2501-2507.2005](https://doi.org/10.1128/JB.187.7.2501-2507.2005), 2005.
- Ludwig, M. and Bryant, D.: *Synechococcus* sp. Strain PCC 7002 transcriptome: Acclimation to temperature, salinity, oxidative stress, and mixotrophic growth conditions, *Frontiers in Microbiology*, 3, 354, doi:[10.3389/fmicb.2012.00354](https://doi.org/10.3389/fmicb.2012.00354), 2012.
- Ma, X., Wang, G., Zhai, Z., Zhou, P. and Hao, Y.: Global transcriptomic analysis and function identification of malolactic enzyme pathway of *Lactobacillus paracasei* L9 in response to bile stress, *Frontiers in Microbiology*, 9, 1978, doi:[10.3389/fmicb.2018.01978](https://doi.org/10.3389/fmicb.2018.01978), 2018.
- Metris, A., George, S. M., Mulholland, F., Carter, A. T. and Baranyi, J.: Metabolic shift of *Escherichia coli* under salt stress in the presence of glycine betaine, *Applied and Environmental Microbiology*, 80(15), 4745–4756, doi:[10.1128/AEM.00599-14](https://doi.org/10.1128/AEM.00599-14), 2014.
- Qiao, J., Huang, S., Te, R., Wang, J., Chen, L. and Zhang, W.: Integrated proteomic and transcriptomic analysis reveals novel genes and regulatory mechanisms involved in salt stress responses in *Synechocystis* sp. PCC 6803, *Applied Microbiology and Biotechnology*, 97(18), 8253–8264, doi:[10.1007/s00253-013-5139-8](https://doi.org/10.1007/s00253-013-5139-8), 2013.
- Shabala, L., Bowman, J., Brown, J., Ross, T., McMeekin, T. and Shabala, S.: Ion transport and osmotic adjustment in *Escherichia coli* in response to ionic and non-ionic osmotica, *Environmental Microbiology*, 11(1), 137–148, doi:[10.1111/j.1462-2920.2008.01748.x](https://doi.org/10.1111/j.1462-2920.2008.01748.x), 2009.
- Shapiguzov, A., Lyukevich, A. A., Allakhverdiev, S. I., Sergeyenko, T. V., Suzuki, I., Murata, N. and Los, D. A.: Osmotic shrinkage of cells of *Synechocystis* sp. PCC 6803 by water efflux via aquaporins regulates osmostress-inducible gene expression, *Microbiology*, 151(2), 447–455, doi:[10.1099/mic.0.27530-0](https://doi.org/10.1099/mic.0.27530-0), 2005.
- Solheim, M., La Rosa, S. L., Mathisen, T., Snipen, L. G., Nes, I. F. and Brede, D. A.: Transcriptomic and functional analysis of NaCl-induced stress in *Enterococcus faecalis*, *PLoS One*, 9(4), 1–13, doi:[10.1371/journal.pone.0094571](https://doi.org/10.1371/journal.pone.0094571), 2014.
- Weber, A. and Jung, K.: Profiling early osmostress-dependent gene expression in *Escherichia coli* using DNA macroarrays, *Journal of Bacteriology*, 184(19), 5502–5507, doi:[10.1128/JB.184.19.5502-5507.2002](https://doi.org/10.1128/JB.184.19.5502-5507.2002), 2002.
- Withman, B., Gunasekera, T. S., Beesetty, P., Agans, R. and Paliy, O.: Transcriptional responses of uropathogenic *Escherichia coli* to increased environmental osmolality caused by salt or urea, *Infection and Immunity*, 81(1), 80–89, doi:[10.1128/IAI.01049-12](https://doi.org/10.1128/IAI.01049-12), 2013.
