# Supplementary material for: Uncovering chemical signatures of salinity gradients through compositional analysis of protein sequences
Source: Copernicus journal article supplement (doi:10.5194/bg-17-6145-2020), 2020-12-08
Supplement: Supplementary file 2 [file bg-17-6145-2020-supplement.zip]

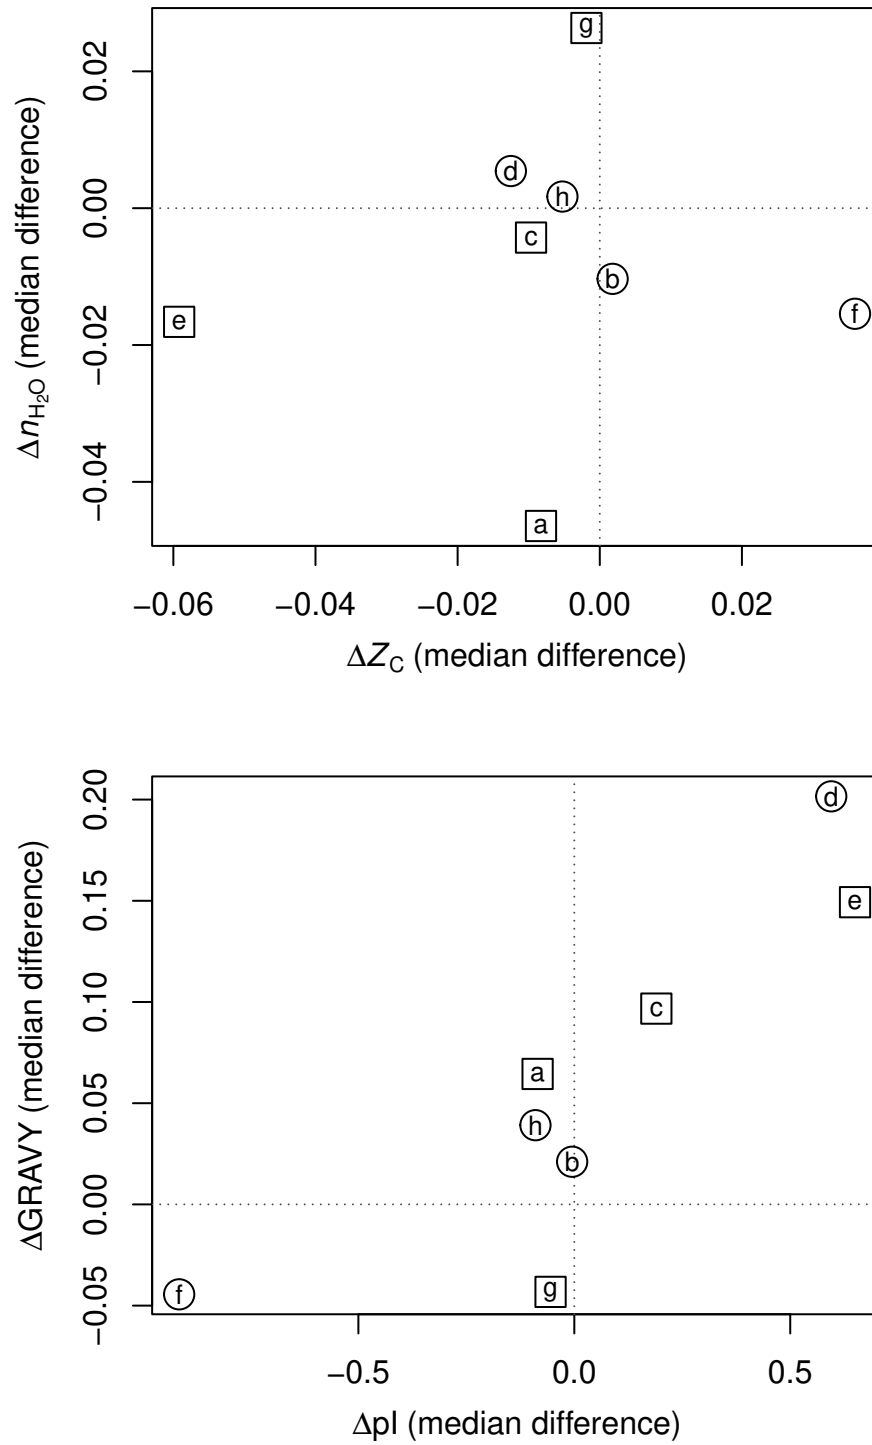

Figure S3: Proteomics data for halophilic archaea in osmotic stress experiments. For completeness, data for both hyperosmotic (circles) and hypoosmotic (squares) experiments, which are reported together in the proteomics studies, are shown here, but only hyperosmotic stress data are used in the manuscript. The plots show median differences of compositional metrics, GRAVY, and pI for the differentially expressed proteins, i.e. median value for all up-regulated proteins minus median value for all down-regulated proteins in each dataset. Data sources, indicated by letters, are described in the following table and footnotes. Reference keys in the table, derived from the first letters of the authors' surnames and publication year, correspond to file names used for the datasets in the canprot package.

| Set | Reference | Description                                        | Down | Up  |
|-----|-----------|----------------------------------------------------|------|-----|
| a   | LRB+09    | <i>Halobacterium salinarum</i> 2.6 M / 4.3 M NaCl  | 105  | 62  |
| b   | LRB+09    | <i>Halobacterium salinarum</i> 5.1 M / 4.3 M NaCl  | 74   | 64  |
| c   | ZLZ+16    | <i>Nocardiopsis xinjiangensis</i> 6% / 10% NaCl    | 146  | 131 |
| d   | ZLZ+16    | <i>Nocardiopsis xinjiangensis</i> 17.5% / 10% NaCl | 57   | 82  |
| e   | LLYL17    | <i>Tetragenococcus halophilus</i> 0 M / 1 M NaCl   | 47   | 131 |
| f   | LLYL17    | <i>Tetragenococcus halophilus</i> 3.5 M / 1 M NaCl | 92   | 39  |
| g   | JSP+19    | <i>Haloferax volcanii</i> 10.8% / 15% NaCl         | 278  | 109 |
| h   | JSP+19    | <i>Haloferax volcanii</i> 19.2% / 15% NaCl         | 337  | 159 |

**a. b.** Tables 1 and 2 of Leuko et al. (2009). **c. d.** Table S-1 of Zhang et al. (2016). Values of reporter intensities at each condition (6%, 10%, and 17.5% NaCl) were quantile normalized (R function preprocess-Core::normalize.quantiles); normalized values were used to compute intensity ratios (6% / 10% NaCl and 17.5% / 10% NaCl). Only proteins with expression ratios > 1.3 in either direction (Zhang et al., 2016), p-values < 0.05, and at least 2 peptides were included. **e. f.** Tables S2 and S3 of Lin et al. (2017). **g. h.** Supporting Table 1C of Jevtić et al. (2019). Only proteins with at least 2-fold expression difference and marked as significant were included.

## References

- Jevtić, Ž., Stoll, B., Pfeiffer, F., Sharma, K., Urlaub, H., Marchfelder, A. and Lenz, C.: The response of *Haloferax volcanii* to salt and temperature stress: A proteome study by label-free mass spectrometry, *Proteomics*, 19(20), 1800491, doi:[10.1002/pmic.201800491](https://doi.org/10.1002/pmic.201800491), 2019.
- Leuko, S., Raftery, M. J., Burns, B. P., Walter, M. R. and Neilan, B. A.: Global protein-level responses of *Halobacterium salinarum* NRC-1 to prolonged changes in external sodium chloride concentrations, *Journal of Proteome Research*, 8(5), 2218–2225, doi:[10.1021/pr800663c](https://doi.org/10.1021/pr800663c), 2009.
- Lin, J., Liang, H., Yan, J. and Luo, L.: The molecular mechanism and post-transcriptional regulation characteristic of *Tetragenococcus halophilus* acclimation to osmotic stress revealed by quantitative proteomics, *Journal of Proteomics*, 168, 1–14, doi:[10.1016/j.jprot.2017.08.014](https://doi.org/10.1016/j.jprot.2017.08.014), 2017.
- Zhang, Y., Li, Y., Zhang, Y., Wang, Z., Zhao, M., Su, N., Zhang, T., Chen, L., Wei, W., Luo, J., Zhou, Y., Xu, Y., Xu, P., Li, W. and Tao, Y.: Quantitative proteomics reveals membrane protein-mediated hypersaline sensitivity and adaptation in halophilic *Nocardiopsis xinjiangensis*, *Journal of Proteome Research*, 15(1), 68–85, doi:[10.1021/acs.jproteome.5b00526](https://doi.org/10.1021/acs.jproteome.5b00526), 2016.
