# Supplementary material for: Uncovering chemical signatures of salinity gradients through compositional analysis of protein sequences
Source: Copernicus journal article supplement (doi:10.5194/bg-17-6145-2020), 2020-12-08
Supplement: Supplementary file 3 [file bg-17-6145-2020-supplement.zip]

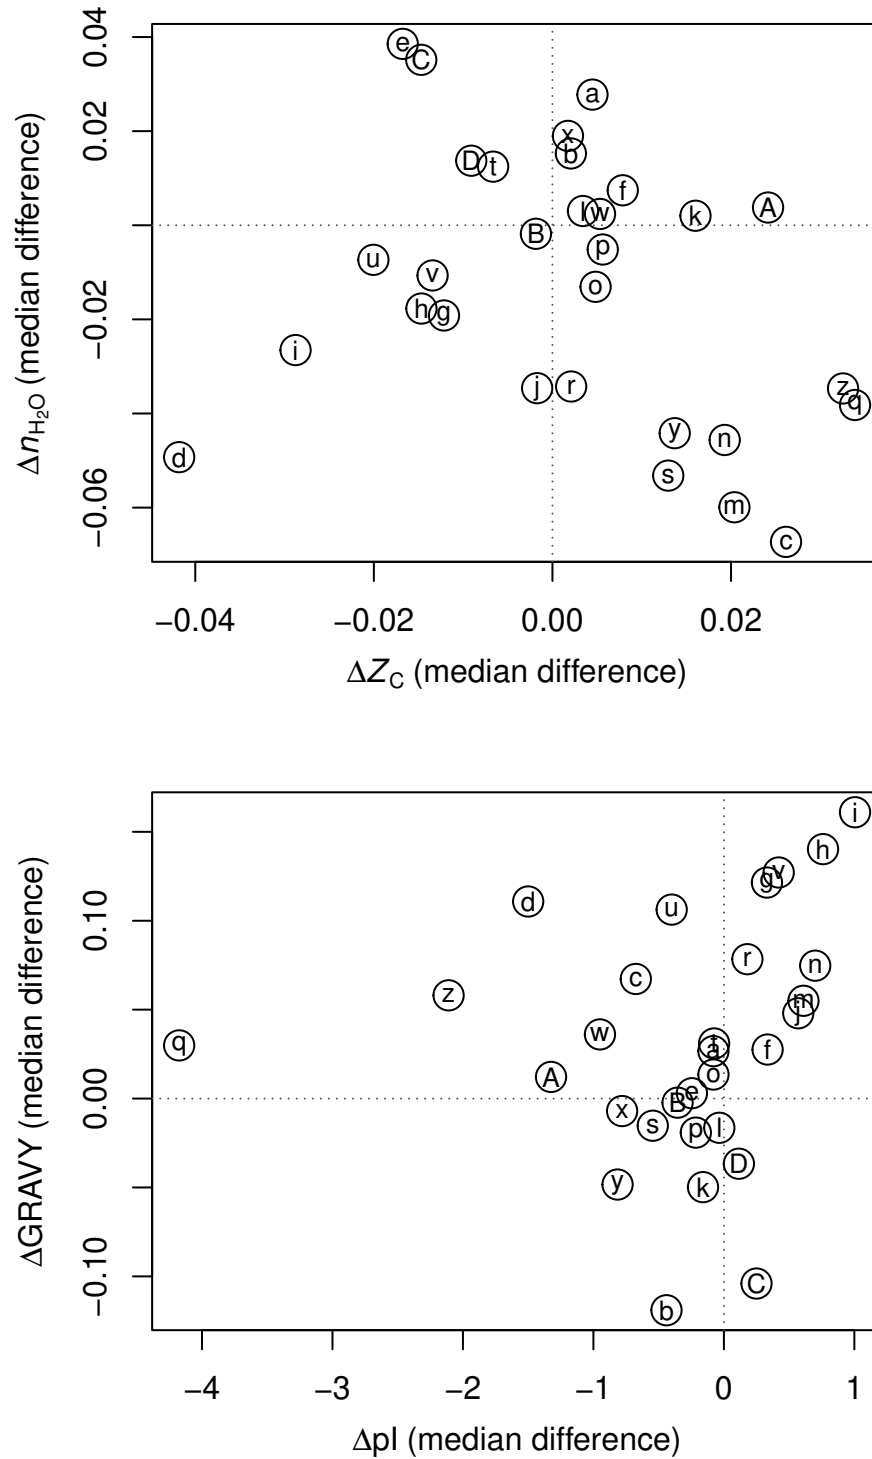

Figure S2: Proteomics data for non-halophilic bacteria in hyperosmotic stress experiments. The plots show median differences of compositional metrics, GRAVY, and pI for the differentially expressed proteins, i.e. median value for all up-regulated proteins minus median value for all down-regulated proteins in each dataset. Data sources, indicated by letters, are described in the following table and footnotes. Reference keys in the table, derived from the first letters of the authors' surnames and publication year, correspond to file names used for the datasets in the canprot package.

| Set | Reference | Description                                                                        | Down | Up  |
|-----|-----------|------------------------------------------------------------------------------------|------|-----|
| a   | PNWB09    | <i>Synechocystis</i> sp. PCC6803 in 6% w/v NaCl vs no added salt                   | 77   | 55  |
| b   | FTR+10    | <i>Corynebacterium glutamicum</i> in 750 mM NaCl vs control medium                 | 27   | 65  |
| c   | LPK+13    | <i>Lactobacillus johnsonii</i> with vs without 0.1-0.3% bile salt                  | 123  | 88  |
| d   | QHT+13    | <i>Synechocystis</i> sp. PCC 6803 Protein in 4% w/v vs 0% added NaCl for 24 h      | 42   | 26  |
| e   | QHT+13    | <i>Synechocystis</i> sp. PCC 6803 Protein in 4% w/v vs 0% added NaCl for 48 h      | 46   | 62  |
| f   | ADW+14    | <i>Bifidobacterium longum</i> BBMN68 Protein with vs without 0.75 g/l ox bile      | 20   | 24  |
| g   | KKG+14    | <i>Escherichia coli</i> Protein in NaCl (0.967 aw) vs control for immediate        | 30   | 158 |
| h   | KKG+14    | <i>Escherichia coli</i> Protein in NaCl (0.967 aw) vs control for 30 min           | 21   | 162 |
| i   | KKG+14    | <i>Escherichia coli</i> Protein in NaCl (0.967 aw) vs control for 80 min           | 37   | 126 |
| j   | KKG+14    | <i>Escherichia coli</i> Protein in NaCl (0.967 aw) vs control for 310 min          | 12   | 399 |
| k   | PBP+14    | <i>Listeria monocytogenes</i> in 3% NaCl vs control at 4.C                         | 54   | 86  |
| l   | PBP+14    | <i>Listeria monocytogenes</i> in 3% NaCl vs control at 37.C                        | 60   | 25  |
| m   | KLB+15    | <i>Caulobacter crescentus</i> Protein in 200 mM sucrose vs M2 minimal salts medium | 33   | 33  |
| n   | KLB+15    | <i>Caulobacter crescentus</i> Protein in 40/50 mM NaCl vs M2 minimal salts medium  | 33   | 27  |
| o   | SKV+16    | <i>Escherichia coli</i> in Glucose vs LB                                           | 743  | 282 |
| p   | SKV+16    | <i>Escherichia coli</i> in Osmotic.stress.glucose vs LB                            | 978  | 343 |
| q   | KAK+17    | <i>Lactobacillus fermentum</i> with vs without 1.2% w/v bile salts                 | 106  | 81  |
| r   | LYS+17    | <i>Lactobacillus salivarius</i> LI01 with vs without 0.15% ox bile                 | 177  | 205 |
| s   | HGC+18    | <i>Lactobacillus casei</i> BL23 in hyper-concentrated vs isotonic sweet whey       | 116  | 64  |
| t   | KSK+18    | <i>Acidihalobacter prosperus</i> DSM 14174 30 g/L / 5 g/L NaCl                     | 292  | 316 |
| u   | LJC+18    | <i>Listeria monocytogenes</i> WT in 0.5 M NaCl vs control medium                   | 65   | 66  |
| v   | LJC+18    | <i>Listeria monocytogenes</i> mutant in 0.5 M NaCl vs control medium               | 37   | 30  |
| w   | TSC18     | <i>Caulobacter crescentus</i> WT in 300 mM sucrose vs control                      | 91   | 28  |
| x   | TSC18     | <i>Caulobacter crescentus</i> GsrN in 300 mM sucrose vs control                    | 99   | 107 |
| y   | LWS+19    | <i>Lactobacillus plantarum</i> FS5-5 in 6-8% w/v vs 0% NaCl                        | 72   | 46  |
| z   | MGF+19    | <i>Staphylococcus aureus</i> in 10% vs 0% NaCl                                     | 88   | 58  |
| A   | MGF+19    | <i>Staphylococcus aureus</i> in 20% vs 0% NaCl                                     | 184  | 99  |
| B   | AST+20    | <i>Lactobacillus fermentum</i> with vs without 0.3% to 1.5% w/v bile salts         | 368  | 378 |
| C   | GBR+20    | <i>Propionibacterium freudenreichii</i> CIRM129 in NaCl vs MMO                     | 90   | 74  |
| D   | GBR+20    | <i>Propionibacterium freudenreichii</i> CIRM1025 in NaCl vs MMO                    | 64   | 78  |

**a.** Additional file 3: Table S2 of Pandhal et al. (2009). **b.** Supplementary Table 8 of Fränzel et al. (2010). Only proteins with consistent expression ratios (all > 1 or all < 1) at each time point (15, 60, and 180 min.) were included. **c.** Supporting Information Table 1 of Lee et al. (2013) (sheets “Up-Down Proteins” and “Unknown function”). **d. e.** Supplementary Tables S3A and S3B of Qiao et al. (2013). **f.** Table 1 (proteins) and supplemental Table S2 (genes) of An et al. (2014). **g. h. i. j.** Supporting Information Table S2 of Kocharunchitt et al. (2014). **k. l.** Supporting Information Table of Pittman et al. (2014), filtered to include proteins with *p*-value < 0.05. **m. n.** Additional file Table S2 of Kohler et al. (2015). **o. p.** Supplementary Table S6 of Schmidt et al. (2016), filtered to include proteins with fold change > 2 or < 0.5 for the ratios Glucose / LB (lysogeny broth) or Osmotic-stress glucose / LB. **q.** Supplementary Table 1 (sheets “0.76 fold down regulated” and “1.3 fold up regulated”) of Kaur et al. (2017). **r.** Supplemental Table S-2 of Lv et al. (2017), filtered to include proteins with log<sub>2</sub> fold change > 1 or < -1 and *p*-value < 0.05. **s.** Supplementary Figure 1 of Huang et al. (2018). **t.** Supplementary Table 1 of Khaleque et al. (2018) (amino acid compositions computed from protein sequences in the list of gene annotations). **u. v.** Tables S1–S6 of Lee et al. (2018). For each of the wild-type and  $\Delta sigB$  mutant, only proteins that were identified in multicellular vesicles in a single condition (0.5 M salt stress or without salt stress) were included. **w. x.** Extracted from proteinGroups.txt in PRIDE project [PXD010072](https://www.ebi.ac.uk/pride/projects/PXD010072)/MaxQuantOutput.tar.gz (Tien et al., 2018), filtered to include proteins with non-zero LFQ intensity values for all replicates in each experiment; the medians of these values were used to compute fold changes; proteins with fold change > 1.5 or < 2/3 were kept. **y.** Table 2 of Li et al. (2019). **z. A.** Supplementary Tables S4 and S5 of Ming et al. (2019), filtered to include proteins with fold change >= 2 or <= 0.5. **B.** Supplementary Table 1 (sheets “>2.0 Fold” and “< 0.5 Fold”) of Ali et al. (2020). **C. D.** Supplementary Table 1 of Gaucher et al. (2020) (column “MMO+NaCl/MMO” for CIRM129 and CIRM1025).

## References

Ali, S. A., Singh, P., Tomar, S. K., Mohanty, A. K. and Behare, P.: Proteomics fingerprints of systemic mechanisms of adaptation to bile in *Lactobacillus fermentum*, Journal of Proteomics, 213, 103600, doi:[10.1016/j.jprot.2019.103600](https://doi.org/10.1016/j.jprot.2019.103600), 2020.

- An, H., Douillard, F. P., Wang, G., Zhai, Z., Yang, J., Song, S., Cui, J., Ren, F., Luo, Y., Zhang, B. and Hao, Y.: Integrated transcriptomic and proteomic analysis of the bile stress response in a centenarian-originated probiotic *Bifidobacterium longum* BBMN68, *Molecular & Cellular Proteomics*, 13(10), 2558–2572, doi:[10.1074/mcp.M114.039156](https://doi.org/10.1074/mcp.M114.039156), 2014.
- Fränzel, B., Trötschel, C., Rückert, C., Kalinowski, J., Poetsch, A. and Wolters, D. A.: Adaptation of *Corynebacterium glutamicum* to salt-stress conditions, *Proteomics*, 10(3), 445–457, doi:[10.1002/pmic.200900482](https://doi.org/10.1002/pmic.200900482), 2010.
- Gaucher, F., Bonnassie, S., Rabah, H., Leverrier, P., Pottier, S., Jardin, J., Briard-Bion, V., Marchand, P., Jeantet, R., Blanc, P. and Jan, G.: Data from a proteomic analysis highlight different osmoadaptations in two strain of *Propionibacterium freudenreichii*, *Data in Brief*, 28, 104932, doi:[10.1016/j.dib.2019.104932](https://doi.org/10.1016/j.dib.2019.104932), 2020.
- Huang, S., Gaucher, F., Cauty, C., Jardin, J., Le Loir, Y., Jeantet, R., Chen, X. D. and Jan, G.: Growth in hyper-concentrated sweet whey triggers multi stress tolerance and spray drying survival in *Lactobacillus casei* BL23: From the molecular basis to new perspectives for sustainable probiotic production, *Frontiers in Microbiology*, 9, 2548, doi:[10.3389/fmicb.2018.02548](https://doi.org/10.3389/fmicb.2018.02548), 2018.
- Kaur, G., Ali, S. A., Kumar, S., Mohanty, A. K. and Behare, P.: Label-free quantitative proteomic analysis of *Lactobacillus fermentum* NCDC 400 during bile salt exposure, *Journal of Proteomics*, 167, 36–45, doi:[10.1016/j.jprot.2017.08.008](https://doi.org/10.1016/j.jprot.2017.08.008), 2017.
- Khaleque, H. N., Shafique, R., Kaksonen, A. H., Boxall, N. J. and Watkin, E. L. J.: Quantitative proteomics using SWATH-MS identifies mechanisms of chloride tolerance in the halophilic acidophile *Acidihalobacter prosperus* DSM 14174, *Research in Microbiology*, 169(10), 638–648, doi:[10.1016/j.resmic.2018.07.002](https://doi.org/10.1016/j.resmic.2018.07.002), 2018.
- Kocharunchitt, C., King, T., Gobius, K., Bowman, J. P. and Ross, T.: Global genome response of *Escherichia coli* O157:H7 Sakai during dynamic changes in growth kinetics induced by an abrupt downshift in water activity, *PLOS One*, 9(3), e90422, doi:[10.1371/journal.pone.0090422](https://doi.org/10.1371/journal.pone.0090422), 2014.
- Kohler, C., Lourenço, R. F., Bernhardt, J., Albrecht, D., Schüler, J., Hecker, M. and Gomes, S. L.: A comprehensive genomic, transcriptomic and proteomic analysis of a hyperosmotic stress sensitive  $\alpha$ -proteobacterium, *BMC Microbiology*, 15(1), 1–15, doi:[10.1186/s12866-015-0404-x](https://doi.org/10.1186/s12866-015-0404-x), 2015.
- Lee, J. Y., Pajarillo, E. A. B., Kim, M. J., Chae, J. P. and Kang, D.-K.: Proteomic and transcriptional analysis of *Lactobacillus johnsonii* PF01 during bile salt exposure by iTRAQ shotgun proteomics and quantitative RT-PCR, *Journal of Proteome Research*, 12(1), 432–443, doi:[10.1021/pr300794y](https://doi.org/10.1021/pr300794y), 2013.
- Lee, T., Jun, S. H., Choi, C. W., Kim, S. I., Lee, J. C. and Shin, J. H.: Salt stress affects global protein expression profiles of extracellular membrane-derived vesicles of *Listeria monocytogenes*, *Microbial Pathogenesis*, 115, 272–279, doi:[10.1016/j.micpath.2017.12.071](https://doi.org/10.1016/j.micpath.2017.12.071), 2018.
- Li, M., Wang, Q., Song, X., Guo, J., Wu, J. and Wu, R.: iTRAQ-based proteomic analysis of responses of *Lactobacillus plantarum* fs5-5 to salt tolerance, *Annals of Microbiology*, 69(4), 377–394, doi:[10.1007/s13213-018-1425-0](https://doi.org/10.1007/s13213-018-1425-0), 2019.
- Lv, L.-X., Yan, R., Shi, H.-Y., Shi, D., Fang, D.-Q., Jiang, H.-Y., Wu, W.-R., Guo, F.-F., Jiang, X.-W., Gu, S.-L., Chen, Y.-B., Yao, J. and Li, L.-J.: Integrated transcriptomic and proteomic analysis of the bile stress response in probiotic *Lactobacillus salivarius* LI01, *Journal of Proteomics*, 150, 216–229, doi:[10.1016/j.jprot.2016.08.021](https://doi.org/10.1016/j.jprot.2016.08.021), 2017.
- Ming, T., Geng, L., Feng, Y., Lu, C., Zhou, J., Li, Y., Zhang, D., He, S., Li, Y., Cheong, L. and Su, X.: iTRAQ-based quantitative proteomic profiling of *Staphylococcus aureus* under different osmotic stress conditions, *Frontiers in Microbiology*, 10, 1082, doi:[10.3389/fmicb.2019.01082](https://doi.org/10.3389/fmicb.2019.01082), 2019.
- Pandhal, J., Noirel, J., Wright, P. C. and Biggs, C. A.: A systems biology approach to investigate the response of *Synechocystis* sp. PCC6803 to a high salt environment, *Saline Systems*, 5(1), 8, doi:[10.1186/1746-1448-5-8](https://doi.org/10.1186/1746-1448-5-8), 2009.
- Pittman, J. R., Buntyn, J. O., Posadas, G., Nanduri, B., Pendarvis, K. and Donaldson, J. R.: Proteomic analysis of cross protection provided between cold and osmotic stress in *Listeria monocytogenes*, *Journal of Proteome Research*, 13(4), 1896–1904, doi:[10.1021/pr401004a](https://doi.org/10.1021/pr401004a), 2014.
- Qiao, J., Huang, S., Te, R., Wang, J., Chen, L. and Zhang, W.: Integrated proteomic and transcriptomic analysis reveals novel genes and regulatory mechanisms involved in salt stress responses in *Synechocystis* sp. PCC 6803, *Applied Microbiology and Biotechnology*, 97(18), 8253–8264, doi:[10.1007/s00253-013-5139-8](https://doi.org/10.1007/s00253-013-5139-8), 2013.

Schmidt, A., Kochanowski, K., Vedelaar, S., Ahrné, E., Volkmer, B., Callipo, L., Knoops, K., Bauer, M., Aebbersold, R. and Heinemann, M.: The quantitative and condition-dependent *Escherichia coli* proteome, Nature Biotechnology, 34(1), 104–110, doi:[10.1038/nbt.3418](https://doi.org/10.1038/nbt.3418), 2016.

Tien, M. Z., Stein, B. J. and Crosson, S.: Coherent feedforward regulation of gene expression by *Caulobacter*  $\sigma^T$  and GsrN during hyperosmotic stress, Journal of Bacteriology, 200(19), e00349–18, doi:[10.1128/JB.00349-18](https://doi.org/10.1128/JB.00349-18), 2018.
