# Supplementary material for: Uncovering chemical signatures of salinity gradients through compositional analysis of protein sequences
Source: Copernicus journal article supplement (doi:10.5194/bg-17-6145-2020), 2020-12-08
Supplement: Supplementary file 4 [file bg-17-6145-2020-supplement.zip]

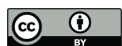

## *Supplement of*

# **Uncovering chemical signatures of salinity gradients through compositional analysis of protein sequences**

**Jeffrey M. Dick et al.**

*Correspondence to:* Jeffrey M. Dick ([jeff@chnosz.net](mailto:jeff@chnosz.net)) and Miao Yu ([yumiao1987@pku.edu.cn](mailto:yumiao1987@pku.edu.cn))

- [bg-17-6145-2020-supplement-title-page.pdf](#)
- [Figure\\_S1.pdf](#)
- [Figure\\_S2.pdf](#)
- [Figure\\_S3.pdf](#)
- [Table\\_S1.xlsx](#)
- [Table\\_S2.xlsx](#)

The copyright of individual parts of the supplement might differ from the CC BY 4.0 License.
